# Supplementary material for: PERBANDINGAN ANTARA METODE MOVING AVERAGE, EXPONENTIAL SMOOTHING, WINTERS DALAM PERAMALAN VOLUME PENJUALAN PT. SATRIAMANDIRI CITRAMULIA BERBASISKAN KOMPUTER
Source: MDPI journal article supplement (doi:10.3390/s23062898), 2011-01-01
Supplement: s1 [file s1]

## **Supporting Information**

### **Sequential dual coating with thermosensitive polymers for advanced fiber optic temperature sensors**

Tejaswi Tanaji Salunkhe<sup>a</sup> and Il Tae Kim<sup>a,\*</sup>

*<sup>a</sup>Department of Chemical and Biological Engineering, Gachon University, Seongnam-si, Gyeonggi-do 13120, South Korea*

\*Corresponding author. Tel.: +82-31-750-8835; Fax: +82-31-750-5363

E-mail addresses: itkim@gachon.ac.kr (I.T. Kim)

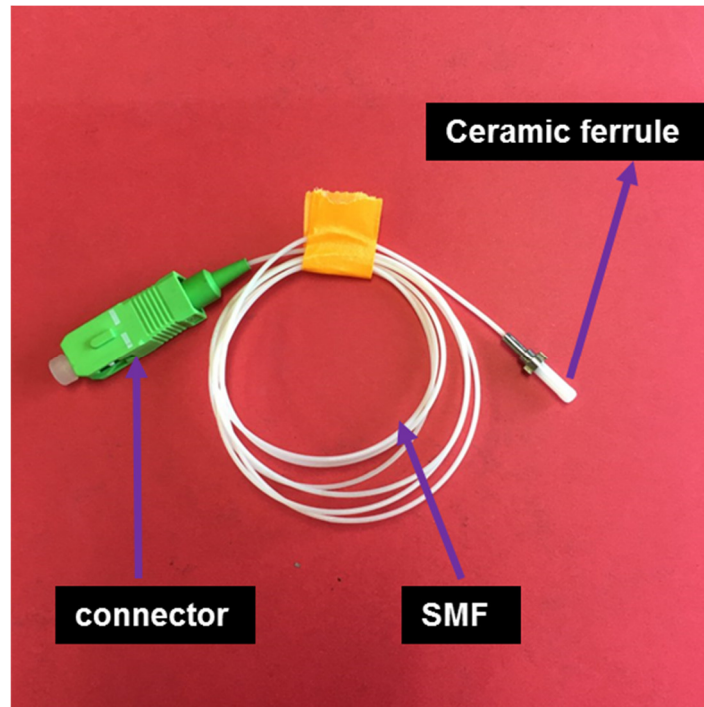

**Figure S1.** The pictorial image of SMF with the ferrule connector.

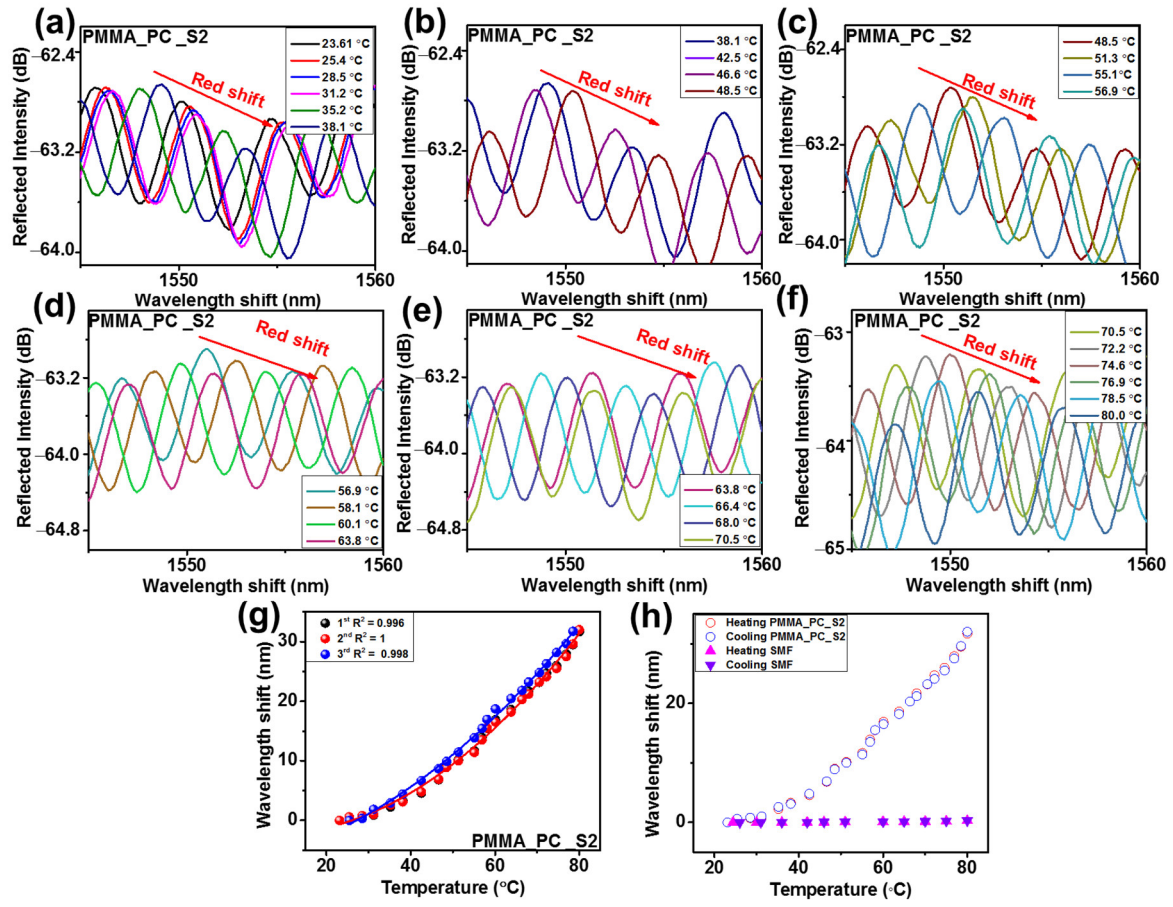

**Figure S2.** Reflected spectra with increase in temperature (a-f), wavelength shift for 3 measurements (g), and (h) average wavelength shift associated with SMF for PMMA\_PC\_S2 DPFPI

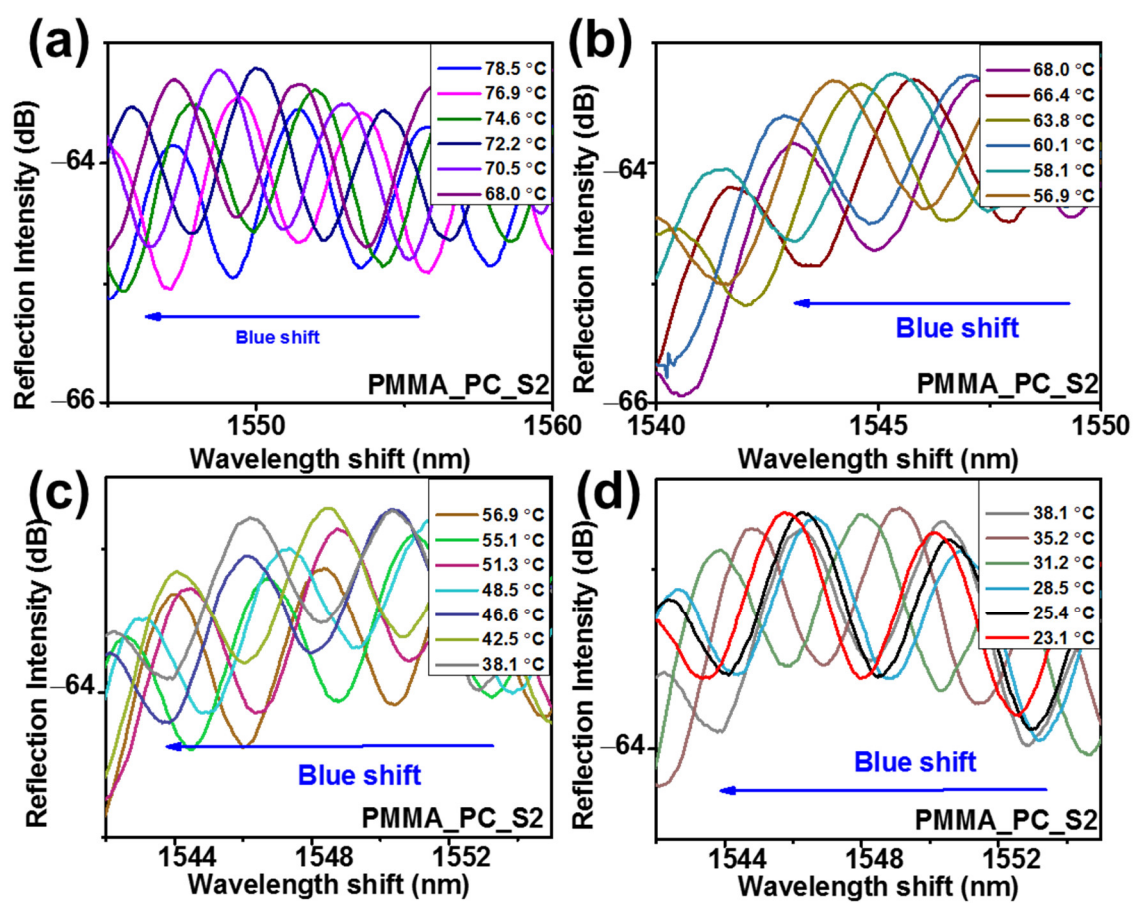

Figure S3. Reflected spectra with decrease in temperature for PMMA\_PC\_S2 DPFPI

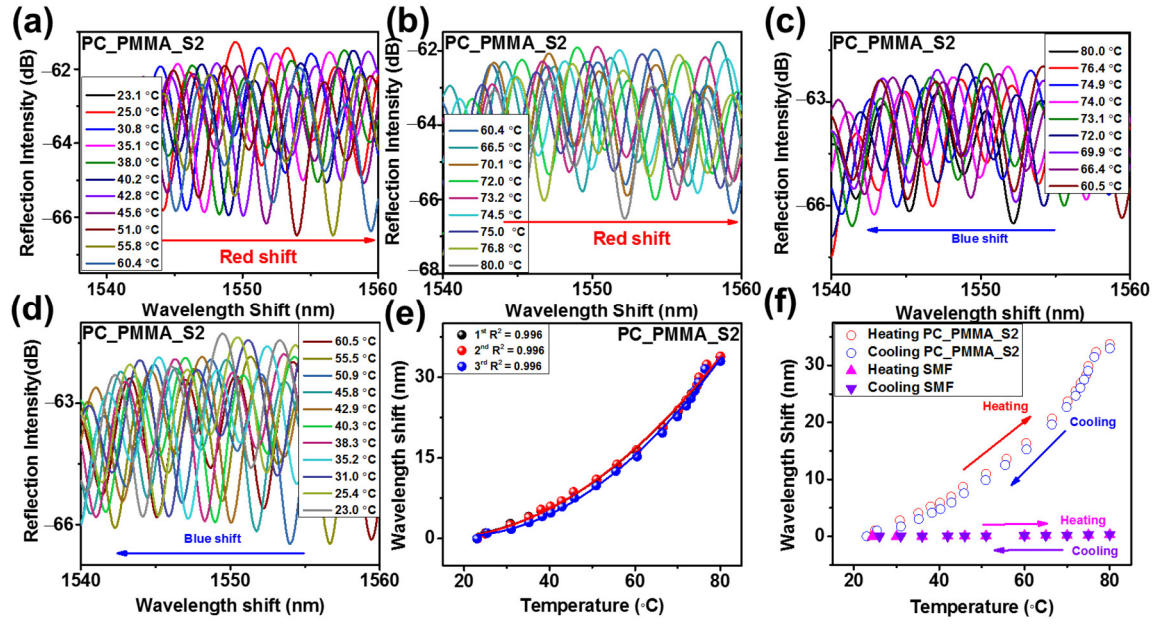

**Figure S4.** Reflected spectra with increase in temperature (a-b), with decrease in temperature (c-d), wavelength shift for 3 measurements (e), and (f) average wavelength shift associated with SMF for PC\_PMMA\_S2 DPFPI

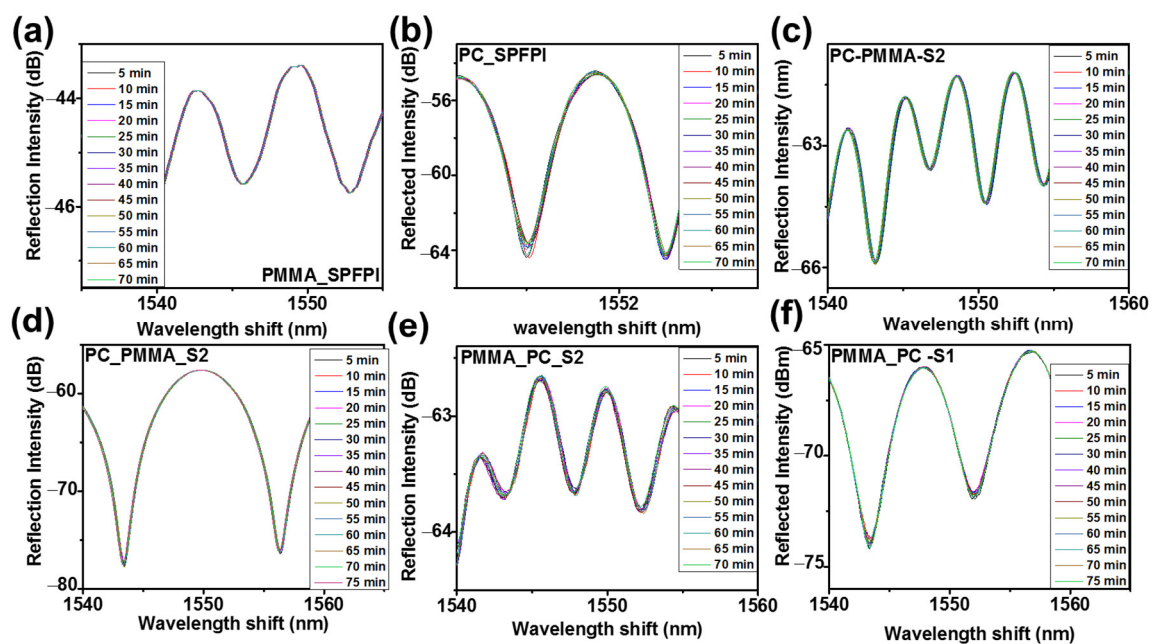

**Figure S5.** Wavelength of spectral dip response at a constant temperature and at various time intervals of (a) PMMA\_SPFPI, (b) PC\_SPFPI, (c)PC\_PMMA\_S1, (d)PC\_PMMA\_S2, (e) PMMA\_PC\_S1 and PMMA\_PC\_S2.

**Table S1.** The comparison of optical fiber temperature sensors.

| Type of fiber                   | Polymer                                                      | T(°C)   | Sensitivity (pm °C <sup>-1</sup> ) | Method                                                                                                       | Ref |
|---------------------------------|--------------------------------------------------------------|---------|------------------------------------|--------------------------------------------------------------------------------------------------------------|-----|
| Single mode + Hollow core fiber | polydimethylsiloxane                                         | 51-70.5 | 2703.5                             | Expensive method, poor reproducibility, requires expensive techniques, complex method                        | [1] |
| Fabry-Perot Interferometer      | Polycarbonate                                                | 20-140  | 245.4                              | Low sensitivity,                                                                                             | [2] |
| Microfiber mode interferometer  | polydimethylsiloxane                                         | 20-48   | 3101.7                             | Requires expensive techniques,                                                                               | [3] |
| Fabry-Perot Interferometer      | Polystyrene                                                  | 25-100  | 439.89                             | Low sensitivity,                                                                                             | [4] |
| Fabry-Perot Interferometer      | step-curing ultraviolet photoresist and polydimethylsiloxane | 20-75   | 689.68                             | Low sensitivity, UV curing method needed for coating                                                         | [5] |
| Fiber Fizeau interferometer     | Norland Optic Adhesive-61                                    | 10-50   | 269.5                              | Narrow operation temperature range, UV curing method needed for coating polymer                              | [6] |
| Fiber Bragg grating             | gold-coated shallow-tapered chirped                          | 30-80   | 9.893                              | CO <sub>2</sub> laser splicing system, gold layer sputtering, optical backscatter reflectometer interrogator | [7] |

|                                                                |                       |         |        |                                                      |                  |
|----------------------------------------------------------------|-----------------------|---------|--------|------------------------------------------------------|------------------|
| Ultra-long period fiber grating + graded index multimode fiber | doping of germanium   | 30-150  | 90.77  | Splicing by arc discharge, fusion splicer            | [8]              |
| Fiber Bragg grating +Single mode +Multimode Fiber              | —                     | 0-900   | 13.4   | Femtosecond laser inscription, fusion splicer        | [9]              |
| Fabry–Perot Interferometer                                     | Poly (vinyl chloride) | 25-60   | 366.0  | Plastic welder used for coating, low sensitivity     | [10]             |
| Fabry–Perot Interferometer                                     | PMMA_PS               | 24.4-80 | 785.5  | Simple dip coating, high sensitivity                 | [11]             |
| Fabry–Perot Interferometer                                     | polyvinyl alcohol     | 25-100  | ~193.3 | Low sensitivity, Stepper motor needed for coating    | [12]             |
| Fabry–Perot Interferometer                                     | PC_PMMA-S1            | 25-80   | 1238.7 | Simple dip coating, high sensitivity reproducibility | <b>This work</b> |

- [1] M.-q. Chen, Y. Zhao, F. Xia, Y. Peng, R.-j. Tong, High sensitivity temperature sensor based on fiber air-microbubble Fabry-Perot interferometer with PDMS-filled hollow-core fiber, *Sensors and Actuators A: Physical*, 275 (2018) 60-66.
- [2] T. Salunkhe Tejaswi, K. lee Ho, W. Choi Hyung, J. Park Sang, H. Kim Ji, T. Kim Il, High sensitivity temperature sensor based on Fresnel reflection with thermosensitive polymer: control of morphology and coating thickness, *Japanese Journal of Applied Physics*, 59 (2020) SGGG06-SGGG06.
- [3] I. Hernandez-Romano, D. Monzon-Hernandez, C. Moreno-Hernandez, D. Moreno-Hernandez, J. Villatoro, High sensitivity temperature sensor based on Fresnel reflection with thermosensitive polymerr, *IEEE Photonics Technology Letters*, 27 (2015) 1-1.
- [4] Salunkhe, Lee, Choi, Park, I.T. Kim, Enhancing Temperature Sensitivity of the Fabry–Perot Interferometer Sensor with Optimization of the Coating Thickness of Polystyrene, *Sensors*, 20 (2020) 794.
- [5] M. Ge, Y. Li, Y. Han, Z. Xia, Z. Guo, J. Gao, S. Qu, High-sensitivity double-parameter sensor based on the fibre-tip Fabry–Pérot interferometer, *Journal of Modern Optics*, 64 (2017) 596-600.
- [6] C.-L. Lee, Y.-W. You, J.-H. Dai, J.-M. Hsu, J.-S. Horng, Hygroscopic polymer microcavity fiber Fizeau interferometer incorporating a fiber Bragg grating for simultaneously sensing humidity and temperature, *Sensors and Actuators B: Chemical*, 222 (2016) 339-346.
- [7] T. Ayupova, M. Shaimerdenova, D. Tosi, Shallow-Tapered Chirped Fiber Bragg Grating Sensors for Dual Refractive Index and Temperature Sensing, *Sensors*, 21 (2021).
- [8] H. Niu, W. Chen, Y. Liu, X. Jin, X. Li, F. Peng, T. Geng, S. Zhang, W. Sun, Strain, bending, refractive index independent temperature sensor based on a graded index multimode fiber embedded long period fiber grating, *Opt Express*, 29 (2021) 22922-22930.
- [9] X. Sun, L. Zhang, L. Zeng, Y. Hu, J.-a. Duan, Micro-bending sensing based on single-mode fiber

spliced multimode fiber Bragg grating structure, *Optics Communications*, 505 (2022) 127513.

[10] Z. Zhang, C. Liao, J. Tang, Z. Bai, K. Guo, M. Hou, J. He, Y. Wang, S. Liu, F. Zhang, Y. Wang, High-Sensitivity Gas-Pressure Sensor Based on Fiber-Tip PVC Diaphragm Fabry–Pérot Interferometer, *Journal of Lightwave Technology*, 35 (2017) 4067-4071.

[11] T.T. Salunkhe, H.K. Lee, H.W. Choi, S.J. Park, I.T. Kim, Simply Fabricated Inexpensive Dual-Polymer-Coated Fabry-Perot Interferometer-Based Temperature Sensors with High Sensitivity, *Sensors*, 2021.

[12] Q. Rong, H. Sun, X. Qiao, J. Zhang, M. Hu, Z. Feng, A miniature fiber-optic temperature sensor based on a Fabry–Perot interferometer, *Journal of Optics*, 14 (2012) 045002.
